# Supplementary material
Source: publisher figshare collection journal article supplement (https://acs.figshare.com/ndownloader/files/4425055)
Supplement: Supplementary file 1 [file 4425055]

 
data_BTNRES
 
_audit_creation_method            SHELXL-97
_chemical_name_systematic
;
 ?
;
_chemical_name_common             ?
_chemical_melting_point           ?
_chemical_formula_moiety          
 'C14 H12 O3, 2(C5 H11 N O2), H2O'
_chemical_formula_sum
 'C24 H36 N2 O8'
_chemical_formula_weight          480.55
 
loop_
 _atom_type_symbol
 _atom_type_description
 _atom_type_scat_dispersion_real
 _atom_type_scat_dispersion_imag
 _atom_type_scat_source
 'C'  'C'   0.0181   0.0091
 'International Tables Vol C Tables 4.2.6.8 and 6.1.1.4'
 'H'  'H'   0.0000   0.0000
 'International Tables Vol C Tables 4.2.6.8 and 6.1.1.4'
 'N'  'N'   0.0311   0.0180
 'International Tables Vol C Tables 4.2.6.8 and 6.1.1.4'
 'O'  'O'   0.0492   0.0322
 'International Tables Vol C Tables 4.2.6.8 and 6.1.1.4'
 
_symmetry_cell_setting            orthorhombic
_symmetry_space_group_name_H-M    P212121
 
loop_
 _symmetry_equiv_pos_as_xyz
 'x, y, z'
 '-x+1/2, -y, z+1/2'
 'x+1/2, -y+1/2, -z'
 '-x, y+1/2, -z+1/2'
 
_cell_length_a                    9.5079(3)
_cell_length_b                    9.6920(3)
_cell_length_c                    26.9227(8)
_cell_angle_alpha                 90.00
_cell_angle_beta                  90.00
_cell_angle_gamma                 90.00
_cell_volume                      2480.94(13)
_cell_formula_units_Z             4
_cell_measurement_temperature     100(2)
_cell_measurement_reflns_used     3793
_cell_measurement_theta_min       6.566
_cell_measurement_theta_max       133.380
 
_exptl_crystal_description        rods
_exptl_crystal_colour             colourless
_exptl_crystal_size_max           0.20
_exptl_crystal_size_mid           0.10
_exptl_crystal_size_min           0.05
_exptl_crystal_density_meas       ?
_exptl_crystal_density_diffrn     1.287
_exptl_crystal_density_method     'not measured'
_exptl_crystal_F_000              1032
_exptl_absorpt_coefficient_mu     0.800
_exptl_absorpt_correction_type    multi-scan
_exptl_absorpt_correction_T_min   0.8565
_exptl_absorpt_correction_T_max   0.9611
_exptl_absorpt_process_details    'SADABS; (Sheldrick, 2003)'
 
_exptl_special_details
;
 ?
;
 
_diffrn_ambient_temperature       100(2)
_diffrn_radiation_wavelength      1.54178
_diffrn_radiation_type            CuK\a
_diffrn_radiation_source          'fine-focus sealed tube'
_diffrn_radiation_monochromator   graphite
_diffrn_measurement_device_type   'BRUKER SMART APEXII CCD'
_diffrn_measurement_method        'omega scans'
_diffrn_detector_area_resol_mean  ?
_diffrn_standards_number          ?
_diffrn_standards_interval_count  ?
_diffrn_standards_interval_time   ?
_diffrn_standards_decay_%         ?
_diffrn_reflns_number             21633
_diffrn_reflns_av_R_equivalents   0.0649
_diffrn_reflns_av_sigmaI/netI     0.0466
_diffrn_reflns_limit_h_min        -10
_diffrn_reflns_limit_h_max        11
_diffrn_reflns_limit_k_min        -11
_diffrn_reflns_limit_k_max        11
_diffrn_reflns_limit_l_min        -31
_diffrn_reflns_limit_l_max        31
_diffrn_reflns_theta_min          3.28
_diffrn_reflns_theta_max          67.56
_reflns_number_total              4407
_reflns_number_gt                 4008
_reflns_threshold_expression      >2sigma(I)
 
_computing_data_collection        'SMART (Bruker, 2002)'
_computing_cell_refinement        'SAINT (Bruker, 2002)'
_computing_data_reduction         'SAINT (Bruker, 2002)'
_computing_structure_solution     'SHELXS-97 (Sheldrick, 1990)'
_computing_structure_refinement   'SHELXL-97 (Sheldrick, 1997)'
_computing_molecular_graphics     ?
_computing_publication_material   'SHELXL-97 (Sheldrick, 1997)'
 
_refine_special_details
;
 Refinement of F^2^ against ALL reflections.  The weighted R-factor wR and
 goodness of fit S are based on F^2^, conventional R-factors R are based
 on F, with F set to zero for negative F^2^. The threshold expression of
 F^2^ > 2sigma(F^2^) is used only for calculating R-factors(gt) etc. and is
 not relevant to the choice of reflections for refinement.  R-factors based
 on F^2^ are statistically about twice as large as those based on F, and R-
 factors based on ALL data will be even larger.
;
 
_refine_ls_structure_factor_coef  Fsqd
_refine_ls_matrix_type            full
_refine_ls_weighting_scheme       calc
_refine_ls_weighting_details
 'calc w=1/[\s^2^(Fo^2^)+(0.0423P)^2^+0.0300P] where P=(Fo^2^+2Fc^2^)/3'
_atom_sites_solution_primary      direct
_atom_sites_solution_secondary    difmap
_atom_sites_solution_hydrogens    geom
_refine_ls_hydrogen_treatment     mixed
_refine_ls_extinction_method      SHELXL
_refine_ls_extinction_coef        0.0039(3)
_refine_ls_extinction_expression
 'Fc^*^=kFc[1+0.001xFc^2^\l^3^/sin(2\q)]^-1/4^'
_refine_ls_abs_structure_details
 'Flack H D (1983), Acta Cryst. A39, 876-881'
_refine_ls_abs_structure_Flack    0.00(15)
_refine_ls_number_reflns          4407
_refine_ls_number_parameters      328
_refine_ls_number_restraints      0
_refine_ls_R_factor_all           0.0381
_refine_ls_R_factor_gt            0.0335
_refine_ls_wR_factor_ref          0.0842
_refine_ls_wR_factor_gt           0.0815
_refine_ls_goodness_of_fit_ref    1.034
_refine_ls_restrained_S_all       1.034
_refine_ls_shift/su_max           0.001
_refine_ls_shift/su_mean          0.000
 
loop_
 _atom_site_label
 _atom_site_type_symbol
 _atom_site_fract_x
 _atom_site_fract_y
 _atom_site_fract_z
 _atom_site_U_iso_or_equiv
 _atom_site_adp_type
 _atom_site_occupancy
 _atom_site_symmetry_multiplicity
 _atom_site_calc_flag
 _atom_site_refinement_flags
 _atom_site_disorder_assembly
 _atom_site_disorder_group
O1 O 0.70252(14) 0.49504(14) 0.20449(5) 0.0235(3) Uani 1 1 d . . .
H111 H 0.6613 0.5345 0.1808 0.039(7) Uiso 1 1 calc R . .
O2 O 0.41736(15) 1.07488(14) 0.53502(5) 0.0296(3) Uani 1 1 d . . .
H211 H 0.4124 1.1001 0.5648 0.048(8) Uiso 1 1 calc R . .
O3 O 0.67959(14) 0.71472(13) 0.61153(5) 0.0244(3) Uani 1 1 d . . .
H311 H 0.7056 0.6337 0.6054 0.036(7) Uiso 1 1 calc R . .
C1 C 0.66148(18) 0.72256(19) 0.52228(7) 0.0202(4) Uani 1 1 d . . .
H1 H 0.7187 0.6426 0.5192 0.024 Uiso 1 1 calc R . .
C2 C 0.62961(18) 0.77418(18) 0.56913(7) 0.0187(4) Uani 1 1 d . . .
C3 C 0.54728(18) 0.89224(19) 0.57431(7) 0.0202(4) Uani 1 1 d . . .
H3 H 0.5254 0.9271 0.6064 0.024 Uiso 1 1 calc R . .
C4 C 0.49727(19) 0.95874(18) 0.53177(7) 0.0207(4) Uani 1 1 d . . .
C5 C 0.52798(19) 0.90723(19) 0.48477(7) 0.0210(4) Uani 1 1 d . . .
H5 H 0.4935 0.9531 0.4561 0.025 Uiso 1 1 calc R . .
C6 C 0.60982(18) 0.78764(18) 0.47970(6) 0.0187(4) Uani 1 1 d . . .
C7 C 0.64342(18) 0.72598(19) 0.43127(7) 0.0206(4) Uani 1 1 d . . .
H71 H 0.714(2) 0.653(2) 0.4314(8) 0.032(6) Uiso 1 1 d . . .
C8 C 0.58404(19) 0.75386(19) 0.38743(7) 0.0202(4) Uani 1 1 d . . .
H81 H 0.513(2) 0.820(2) 0.3860(7) 0.023(5) Uiso 1 1 d . . .
C9 C 0.61818(19) 0.68851(18) 0.33992(7) 0.0192(4) Uani 1 1 d . . .
C10 C 0.54939(18) 0.73074(19) 0.29657(7) 0.0212(4) Uani 1 1 d . . .
H10 H 0.4818 0.8027 0.2985 0.025 Uiso 1 1 calc R . .
C11 C 0.57721(18) 0.67025(19) 0.25088(7) 0.0207(4) Uani 1 1 d . . .
H11 H 0.5305 0.7025 0.2219 0.025 Uiso 1 1 calc R . .
C12 C 0.67352(19) 0.56224(18) 0.24739(7) 0.0200(4) Uani 1 1 d . . .
C13 C 0.7428(2) 0.5186(2) 0.29038(7) 0.0241(4) Uani 1 1 d . . .
H13 H 0.8088 0.4452 0.2886 0.029 Uiso 1 1 calc R . .
C14 C 0.7163(2) 0.58077(19) 0.33522(7) 0.0226(4) Uani 1 1 d . . .
H14 H 0.7657 0.5502 0.3639 0.027 Uiso 1 1 calc R . .
N21 N 0.87697(16) 0.03640(16) 0.32822(6) 0.0211(3) Uani 1 1 d . . .
O21 O 0.88655(14) 0.29408(14) 0.38188(5) 0.0274(3) Uani 1 1 d . . .
O22 O 1.07823(15) 0.35957(14) 0.33969(5) 0.0333(3) Uani 1 1 d . . .
C21 C 0.98103(19) 0.2789(2) 0.34963(7) 0.0222(4) Uani 1 1 d . . .
C22 C 0.98482(19) 0.14764(18) 0.31801(7) 0.0209(4) Uani 1 1 d . . .
H22A H 0.9751 0.1754 0.2828 0.025 Uiso 1 1 calc R . .
H22B H 1.0792 0.1058 0.3218 0.025 Uiso 1 1 calc R . .
C23 C 0.73265(19) 0.0852(2) 0.31407(7) 0.0248(4) Uani 1 1 d . . .
H23A H 0.7313 0.1091 0.2787 0.030 Uiso 1 1 calc R . .
H23B H 0.7082 0.1667 0.3338 0.030 Uiso 1 1 calc R . .
H23C H 0.6642 0.0117 0.3205 0.030 Uiso 1 1 calc R . .
C24 C 0.8783(2) -0.0067(2) 0.38187(7) 0.0268(4) Uani 1 1 d . . .
H24A H 0.8227 -0.0912 0.3859 0.032 Uiso 1 1 calc R . .
H24B H 0.8376 0.0668 0.4023 0.032 Uiso 1 1 calc R . .
H24C H 0.9754 -0.0240 0.3924 0.032 Uiso 1 1 calc R . .
C25 C 0.9152(2) -0.08643(19) 0.29702(8) 0.0278(4) Uani 1 1 d . . .
H25A H 0.9175 -0.0595 0.2619 0.033 Uiso 1 1 calc R . .
H25B H 0.8450 -0.1593 0.3018 0.033 Uiso 1 1 calc R . .
H25C H 1.0080 -0.1207 0.3070 0.033 Uiso 1 1 calc R . .
N31 N 0.40921(15) 0.36484(15) 0.43621(5) 0.0200(3) Uani 1 1 d . . .
O31 O 0.40586(14) 0.12367(13) 0.37344(5) 0.0244(3) Uani 1 1 d . . .
O32 O 0.21242(14) 0.04636(13) 0.41175(5) 0.0263(3) Uani 1 1 d . . .
C31 C 0.30974(19) 0.13074(19) 0.40514(6) 0.0200(4) Uani 1 1 d . . .
C32 C 0.30254(18) 0.25070(18) 0.44160(6) 0.0202(4) Uani 1 1 d . . .
H32A H 0.2078 0.2924 0.4390 0.024 Uiso 1 1 calc R . .
H32B H 0.3113 0.2125 0.4756 0.024 Uiso 1 1 calc R . .
C34 C 0.55704(19) 0.3108(2) 0.44099(8) 0.0291(5) Uani 1 1 d . . .
H34A H 0.5785 0.2512 0.4126 0.035 Uiso 1 1 calc R . .
H34B H 0.5657 0.2577 0.4718 0.035 Uiso 1 1 calc R . .
H34C H 0.6231 0.3884 0.4417 0.035 Uiso 1 1 calc R . .
C35 C 0.3897(2) 0.4367(2) 0.38748(7) 0.0276(4) Uani 1 1 d . . .
H35A H 0.2929 0.4707 0.3850 0.033 Uiso 1 1 calc R . .
H35B H 0.4082 0.3719 0.3603 0.033 Uiso 1 1 calc R . .
H35C H 0.4552 0.5145 0.3852 0.033 Uiso 1 1 calc R . .
C36 C 0.3849(2) 0.4654(2) 0.47769(7) 0.0275(4) Uani 1 1 d . . .
H36A H 0.4003 0.4192 0.5096 0.033 Uiso 1 1 calc R . .
H36B H 0.2880 0.4997 0.4761 0.033 Uiso 1 1 calc R . .
H36C H 0.4504 0.5429 0.4744 0.033 Uiso 1 1 calc R . .
O41 O 0.84696(17) 0.12099(16) 0.20043(5) 0.0383(4) Uani 1 1 d . . .
H411 H 0.8625 0.0435 0.1836 0.046 Uiso 1 1 d R . .
H412 H 0.8329 0.1922 0.1780 0.046 Uiso 1 1 d R . .
 
loop_
 _atom_site_aniso_label
 _atom_site_aniso_U_11
 _atom_site_aniso_U_22
 _atom_site_aniso_U_33
 _atom_site_aniso_U_23
 _atom_site_aniso_U_13
 _atom_site_aniso_U_12
O1 0.0265(7) 0.0248(7) 0.0191(6) 0.0003(5) -0.0009(6) 0.0021(6)
O2 0.0404(8) 0.0271(7) 0.0212(7) -0.0025(6) -0.0042(6) 0.0168(6)
O3 0.0347(7) 0.0189(7) 0.0196(7) 0.0010(5) -0.0033(5) 0.0068(6)
C1 0.0199(9) 0.0149(9) 0.0258(10) -0.0006(8) -0.0015(7) 0.0006(7)
C2 0.0195(9) 0.0161(9) 0.0206(9) 0.0025(7) -0.0027(7) -0.0027(7)
C3 0.0220(9) 0.0197(9) 0.0189(8) -0.0013(7) 0.0009(7) 0.0006(7)
C4 0.0202(9) 0.0182(9) 0.0237(9) 0.0020(7) -0.0017(7) 0.0015(7)
C5 0.0229(9) 0.0211(10) 0.0190(9) 0.0030(7) -0.0043(7) 0.0008(7)
C6 0.0185(9) 0.0162(9) 0.0215(9) -0.0004(7) -0.0008(7) -0.0033(7)
C7 0.0209(9) 0.0163(9) 0.0245(10) 0.0005(8) 0.0004(7) -0.0020(7)
C8 0.0182(9) 0.0185(9) 0.0240(10) 0.0008(8) 0.0005(7) -0.0012(7)
C9 0.0186(9) 0.0182(9) 0.0207(9) 0.0018(7) 0.0000(7) -0.0050(7)
C10 0.0189(9) 0.0198(9) 0.0248(9) 0.0013(8) -0.0011(7) 0.0002(7)
C11 0.0188(9) 0.0230(10) 0.0202(9) 0.0045(8) -0.0042(7) -0.0020(7)
C12 0.0206(9) 0.0194(9) 0.0200(9) 0.0008(8) 0.0021(7) -0.0044(7)
C13 0.0245(10) 0.0216(10) 0.0261(10) 0.0036(8) 0.0017(8) 0.0039(7)
C14 0.0231(9) 0.0246(10) 0.0201(9) 0.0044(8) -0.0019(8) 0.0008(7)
N21 0.0198(8) 0.0203(8) 0.0230(8) -0.0005(6) 0.0014(6) -0.0029(6)
O21 0.0259(7) 0.0270(7) 0.0295(7) -0.0069(6) 0.0008(6) -0.0012(6)
O22 0.0364(8) 0.0257(8) 0.0376(8) -0.0047(6) 0.0026(6) -0.0119(6)
C21 0.0222(9) 0.0213(9) 0.0230(9) 0.0031(8) -0.0064(8) -0.0011(8)
C22 0.0200(9) 0.0207(10) 0.0221(9) -0.0004(8) 0.0005(7) -0.0028(7)
C23 0.0193(9) 0.0278(11) 0.0274(10) -0.0029(8) -0.0014(8) -0.0014(7)
C24 0.0294(11) 0.0245(10) 0.0264(10) 0.0057(8) -0.0015(8) -0.0048(8)
C25 0.0299(10) 0.0178(9) 0.0359(11) -0.0032(8) 0.0000(9) -0.0021(8)
N31 0.0200(8) 0.0179(8) 0.0221(8) -0.0027(6) -0.0007(6) -0.0011(6)
O31 0.0267(7) 0.0244(7) 0.0222(6) -0.0030(5) -0.0002(6) -0.0007(6)
O32 0.0306(8) 0.0192(7) 0.0290(7) 0.0023(5) -0.0023(6) -0.0082(6)
C31 0.0232(10) 0.0191(9) 0.0178(9) 0.0038(7) -0.0053(7) 0.0004(7)
C32 0.0183(9) 0.0197(9) 0.0226(9) 0.0040(7) 0.0001(7) -0.0037(7)
C34 0.0173(9) 0.0346(11) 0.0355(11) -0.0070(9) -0.0037(8) -0.0010(8)
C35 0.0328(11) 0.0228(10) 0.0272(10) 0.0072(8) 0.0022(8) -0.0069(8)
C36 0.0293(10) 0.0234(10) 0.0298(10) -0.0074(8) -0.0007(8) -0.0027(8)
O41 0.0579(10) 0.0323(8) 0.0247(8) 0.0006(6) 0.0018(7) 0.0092(7)
 
_geom_special_details
;
 All esds (except the esd in the dihedral angle between two l.s. planes)
 are estimated using the full covariance matrix.  The cell esds are taken
 into account individually in the estimation of esds in distances, angles
 and torsion angles; correlations between esds in cell parameters are only
 used when they are defined by crystal symmetry.  An approximate (isotropic)
 treatment of cell esds is used for estimating esds involving l.s. planes.
;
 
loop_
 _geom_bond_atom_site_label_1
 _geom_bond_atom_site_label_2
 _geom_bond_distance
 _geom_bond_site_symmetry_2
 _geom_bond_publ_flag
O1 C12 1.354(2) . ?
O1 H111 0.8400 . ?
O2 C4 1.361(2) . ?
O2 H211 0.8400 . ?
O3 C2 1.364(2) . ?
O3 H311 0.8400 . ?
C1 C2 1.390(3) . ?
C1 C6 1.398(2) . ?
C1 H1 0.9500 . ?
C2 C3 1.393(3) . ?
C3 C4 1.398(3) . ?
C3 H3 0.9500 . ?
C4 C5 1.391(3) . ?
C5 C6 1.403(3) . ?
C5 H5 0.9500 . ?
C6 C7 1.469(3) . ?
C7 C8 1.336(3) . ?
C7 H71 0.98(2) . ?
C8 C9 1.464(3) . ?
C8 H81 0.93(2) . ?
C9 C10 1.399(3) . ?
C9 C14 1.406(3) . ?
C10 C11 1.388(3) . ?
C10 H10 0.9500 . ?
C11 C12 1.394(3) . ?
C11 H11 0.9500 . ?
C12 C13 1.397(3) . ?
C13 C14 1.372(3) . ?
C13 H13 0.9500 . ?
C14 H14 0.9500 . ?
N21 C23 1.501(2) . ?
N21 C25 1.502(2) . ?
N21 C24 1.504(2) . ?
N21 C22 1.513(2) . ?
O21 C21 1.258(2) . ?
O22 C21 1.240(2) . ?
C21 C22 1.531(2) . ?
C22 H22A 0.9900 . ?
C22 H22B 0.9900 . ?
C23 H23A 0.9800 . ?
C23 H23B 0.9800 . ?
C23 H23C 0.9800 . ?
C24 H24A 0.9800 . ?
C24 H24B 0.9800 . ?
C24 H24C 0.9800 . ?
C25 H25A 0.9800 . ?
C25 H25B 0.9800 . ?
C25 H25C 0.9800 . ?
N31 C35 1.497(2) . ?
N31 C36 1.500(2) . ?
N31 C34 1.506(2) . ?
N31 C32 1.508(2) . ?
O31 C31 1.252(2) . ?
O32 C31 1.248(2) . ?
C31 C32 1.523(3) . ?
C32 H32A 0.9900 . ?
C32 H32B 0.9900 . ?
C34 H34A 0.9800 . ?
C34 H34B 0.9800 . ?
C34 H34C 0.9800 . ?
C35 H35A 0.9800 . ?
C35 H35B 0.9800 . ?
C35 H35C 0.9800 . ?
C36 H36A 0.9800 . ?
C36 H36B 0.9800 . ?
C36 H36C 0.9800 . ?
O41 H411 0.8891 . ?
O41 H412 0.9268 . ?
 
loop_
 _geom_angle_atom_site_label_1
 _geom_angle_atom_site_label_2
 _geom_angle_atom_site_label_3
 _geom_angle
 _geom_angle_site_symmetry_1
 _geom_angle_site_symmetry_3
 _geom_angle_publ_flag
C12 O1 H111 109.5 . . ?
C4 O2 H211 109.5 . . ?
C2 O3 H311 109.5 . . ?
C2 C1 C6 120.34(16) . . ?
C2 C1 H1 119.8 . . ?
C6 C1 H1 119.8 . . ?
O3 C2 C1 122.09(16) . . ?
O3 C2 C3 117.31(16) . . ?
C1 C2 C3 120.58(16) . . ?
C2 C3 C4 119.20(16) . . ?
C2 C3 H3 120.4 . . ?
C4 C3 H3 120.4 . . ?
O2 C4 C5 118.19(16) . . ?
O2 C4 C3 121.25(16) . . ?
C5 C4 C3 120.56(16) . . ?
C4 C5 C6 120.09(16) . . ?
C4 C5 H5 120.0 . . ?
C6 C5 H5 120.0 . . ?
C1 C6 C5 119.21(16) . . ?
C1 C6 C7 117.90(15) . . ?
C5 C6 C7 122.89(16) . . ?
C8 C7 C6 127.57(17) . . ?
C8 C7 H71 116.1(13) . . ?
C6 C7 H71 116.3(13) . . ?
C7 C8 C9 126.21(17) . . ?
C7 C8 H81 118.7(12) . . ?
C9 C8 H81 115.1(12) . . ?
C10 C9 C14 116.90(16) . . ?
C10 C9 C8 119.91(16) . . ?
C14 C9 C8 123.17(16) . . ?
C11 C10 C9 121.78(17) . . ?
C11 C10 H10 119.1 . . ?
C9 C10 H10 119.1 . . ?
C10 C11 C12 120.14(16) . . ?
C10 C11 H11 119.9 . . ?
C12 C11 H11 119.9 . . ?
O1 C12 C11 123.53(16) . . ?
O1 C12 C13 117.72(16) . . ?
C11 C12 C13 118.74(17) . . ?
C14 C13 C12 120.64(17) . . ?
C14 C13 H13 119.7 . . ?
C12 C13 H13 119.7 . . ?
C13 C14 C9 121.78(17) . . ?
C13 C14 H14 119.1 . . ?
C9 C14 H14 119.1 . . ?
C23 N21 C25 109.21(15) . . ?
C23 N21 C24 109.83(14) . . ?
C25 N21 C24 108.36(15) . . ?
C23 N21 C22 110.42(14) . . ?
C25 N21 C22 107.42(14) . . ?
C24 N21 C22 111.53(14) . . ?
O22 C21 O21 127.42(18) . . ?
O22 C21 C22 112.73(16) . . ?
O21 C21 C22 119.84(16) . . ?
N21 C22 C21 118.37(15) . . ?
N21 C22 H22A 107.7 . . ?
C21 C22 H22A 107.7 . . ?
N21 C22 H22B 107.7 . . ?
C21 C22 H22B 107.7 . . ?
H22A C22 H22B 107.1 . . ?
N21 C23 H23A 109.5 . . ?
N21 C23 H23B 109.5 . . ?
H23A C23 H23B 109.5 . . ?
N21 C23 H23C 109.5 . . ?
H23A C23 H23C 109.5 . . ?
H23B C23 H23C 109.5 . . ?
N21 C24 H24A 109.5 . . ?
N21 C24 H24B 109.5 . . ?
H24A C24 H24B 109.5 . . ?
N21 C24 H24C 109.5 . . ?
H24A C24 H24C 109.5 . . ?
H24B C24 H24C 109.5 . . ?
N21 C25 H25A 109.5 . . ?
N21 C25 H25B 109.5 . . ?
H25A C25 H25B 109.5 . . ?
N21 C25 H25C 109.5 . . ?
H25A C25 H25C 109.5 . . ?
H25B C25 H25C 109.5 . . ?
C35 N31 C36 109.34(14) . . ?
C35 N31 C34 110.65(15) . . ?
C36 N31 C34 107.84(14) . . ?
C35 N31 C32 110.01(14) . . ?
C36 N31 C32 107.53(14) . . ?
C34 N31 C32 111.37(14) . . ?
O32 C31 O31 127.06(17) . . ?
O32 C31 C32 112.02(16) . . ?
O31 C31 C32 120.92(16) . . ?
N31 C32 C31 117.89(14) . . ?
N31 C32 H32A 107.8 . . ?
C31 C32 H32A 107.8 . . ?
N31 C32 H32B 107.8 . . ?
C31 C32 H32B 107.8 . . ?
H32A C32 H32B 107.2 . . ?
N31 C34 H34A 109.5 . . ?
N31 C34 H34B 109.5 . . ?
H34A C34 H34B 109.5 . . ?
N31 C34 H34C 109.5 . . ?
H34A C34 H34C 109.5 . . ?
H34B C34 H34C 109.5 . . ?
N31 C35 H35A 109.5 . . ?
N31 C35 H35B 109.5 . . ?
H35A C35 H35B 109.5 . . ?
N31 C35 H35C 109.5 . . ?
H35A C35 H35C 109.5 . . ?
H35B C35 H35C 109.5 . . ?
N31 C36 H36A 109.5 . . ?
N31 C36 H36B 109.5 . . ?
H36A C36 H36B 109.5 . . ?
N31 C36 H36C 109.5 . . ?
H36A C36 H36C 109.5 . . ?
H36B C36 H36C 109.5 . . ?
H411 O41 H412 108.7 . . ?
 
loop_
 _geom_torsion_atom_site_label_1
 _geom_torsion_atom_site_label_2
 _geom_torsion_atom_site_label_3
 _geom_torsion_atom_site_label_4
 _geom_torsion
 _geom_torsion_site_symmetry_1
 _geom_torsion_site_symmetry_2
 _geom_torsion_site_symmetry_3
 _geom_torsion_site_symmetry_4
 _geom_torsion_publ_flag
C6 C1 C2 O3 -179.09(16) . . . . ?
C6 C1 C2 C3 -0.8(3) . . . . ?
O3 C2 C3 C4 178.18(16) . . . . ?
C1 C2 C3 C4 -0.2(3) . . . . ?
C2 C3 C4 O2 -179.52(16) . . . . ?
C2 C3 C4 C5 0.6(3) . . . . ?
O2 C4 C5 C6 -179.90(16) . . . . ?
C3 C4 C5 C6 0.0(3) . . . . ?
C2 C1 C6 C5 1.3(3) . . . . ?
C2 C1 C6 C7 -178.18(17) . . . . ?
C4 C5 C6 C1 -0.9(3) . . . . ?
C4 C5 C6 C7 178.56(17) . . . . ?
C1 C6 C7 C8 165.83(18) . . . . ?
C5 C6 C7 C8 -13.7(3) . . . . ?
C6 C7 C8 C9 -178.73(17) . . . . ?
C7 C8 C9 C10 -178.43(17) . . . . ?
C7 C8 C9 C14 3.1(3) . . . . ?
C14 C9 C10 C11 -0.5(3) . . . . ?
C8 C9 C10 C11 -179.12(17) . . . . ?
C9 C10 C11 C12 1.5(3) . . . . ?
C10 C11 C12 O1 177.65(17) . . . . ?
C10 C11 C12 C13 -1.3(3) . . . . ?
O1 C12 C13 C14 -178.87(17) . . . . ?
C11 C12 C13 C14 0.1(3) . . . . ?
C12 C13 C14 C9 0.9(3) . . . . ?
C10 C9 C14 C13 -0.7(3) . . . . ?
C8 C9 C14 C13 177.88(18) . . . . ?
C23 N21 C22 C21 68.1(2) . . . . ?
C25 N21 C22 C21 -172.94(16) . . . . ?
C24 N21 C22 C21 -54.3(2) . . . . ?
O22 C21 C22 N21 176.62(15) . . . . ?
O21 C21 C22 N21 -2.6(2) . . . . ?
C35 N31 C32 C31 63.99(19) . . . . ?
C36 N31 C32 C31 -177.02(15) . . . . ?
C34 N31 C32 C31 -59.1(2) . . . . ?
O32 C31 C32 N31 -176.79(14) . . . . ?
O31 C31 C32 N31 3.8(2) . . . . ?
 
loop_
 _geom_hbond_atom_site_label_D
 _geom_hbond_atom_site_label_H
 _geom_hbond_atom_site_label_A
 _geom_hbond_distance_DH
 _geom_hbond_distance_HA
 _geom_hbond_distance_DA
 _geom_hbond_angle_DHA
 _geom_hbond_site_symmetry_A
O1 H111 O31  0.84 1.81 2.6491(18) 172.8 4_655
O2 H211 O21  0.84 1.78 2.5893(18) 160.9 3_466
O3 H311 O32  0.84 1.81 2.6255(18) 164.7 3_556
O41 H411 O22  0.89 1.97 2.845(2) 166.6 4_745
O41 H412 O3  0.93 2.01 2.8858(19) 157.5 2_664
 
_diffrn_measured_fraction_theta_max    0.990
_diffrn_reflns_theta_full              67.56
_diffrn_measured_fraction_theta_full   0.990
_refine_diff_density_max    0.168
_refine_diff_density_min   -0.149
_refine_diff_density_rms    0.035
